# Supplementary material for: Application of Artificial Intelligence in COVID-19 Pandemic: Bibliometric Analysis
Source: Healthcare (Basel). 2021 Apr 9;9(4):441. doi: 10.3390/healthcare9040441 (PMC8070493; doi:10.3390/healthcare9040441)
Supplement: Supplementary file 1 [file healthcare-09-00441-s001.pdf]

## Supplementary Table:

Table S1:

| Keywords                                                                                                                                                                                                                                        |
|-------------------------------------------------------------------------------------------------------------------------------------------------------------------------------------------------------------------------------------------------|
| <b>Step 1:</b> "Artificial intel*", OR "machine learning" OR "deep learning" OR "neural network*", OR "CNN", OR "convolutional neural network" OR "SVM" OR "Random forest" OR "Logistic regression" OR "RNN" OR "LSTM"                          |
| <b>Step 2:</b> ("COVID-19" AND "risk fact*" ) OR ("COVID-19" AND "disease detection") OR ("COVID-19" AND "disease classif*") OR ("COVID-19" AND "disease severity") OR ("COVID-19 AND "mortality risk") OR ("COVID-19 AND "epidemic tren*").... |
| Step 1 + Step 2                                                                                                                                                                                                                                 |

## Supplementary figure:

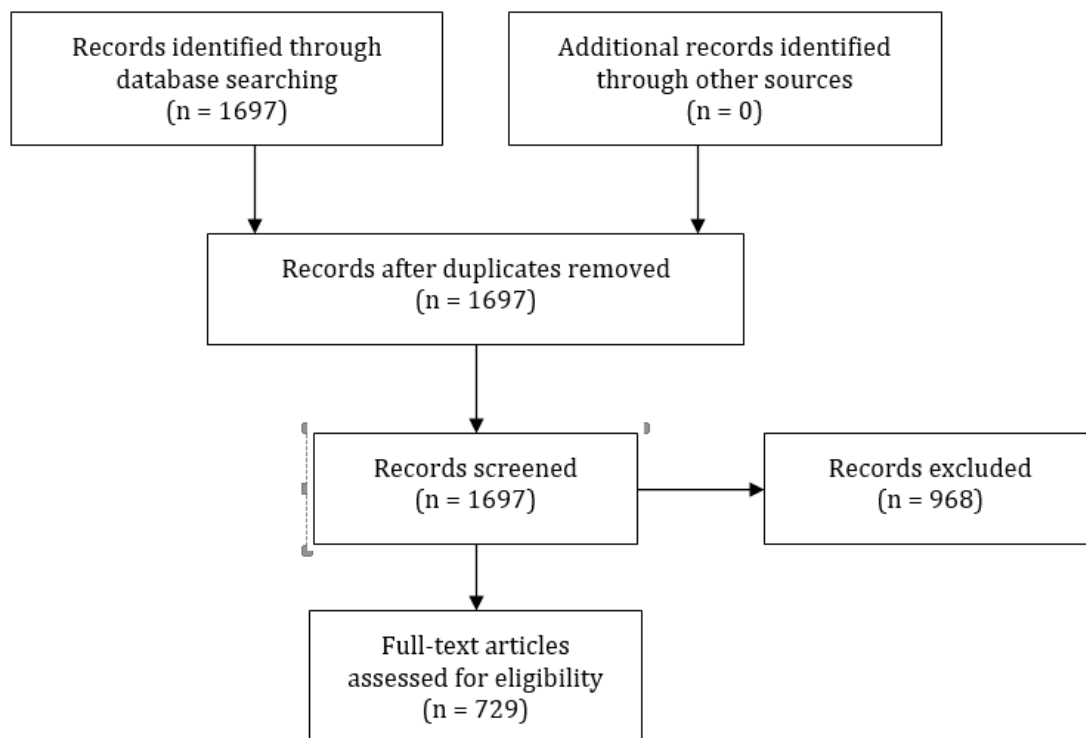

Figure S1. Study selection.

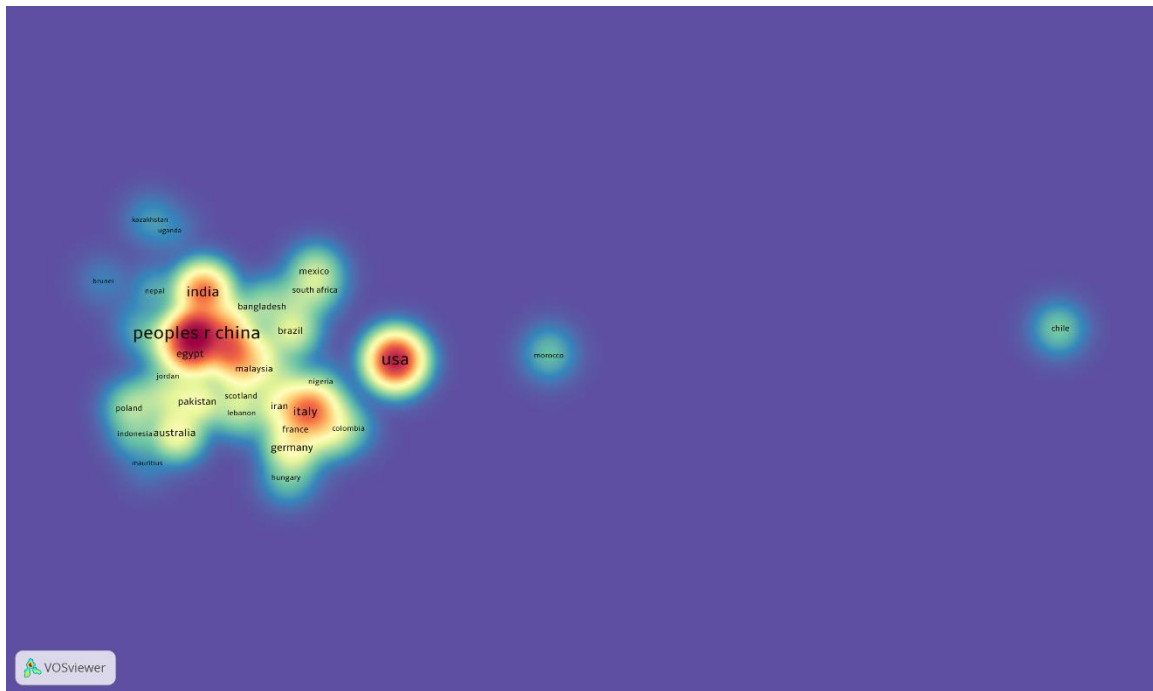

**Figure S2:** Distribution of countries' contribution.

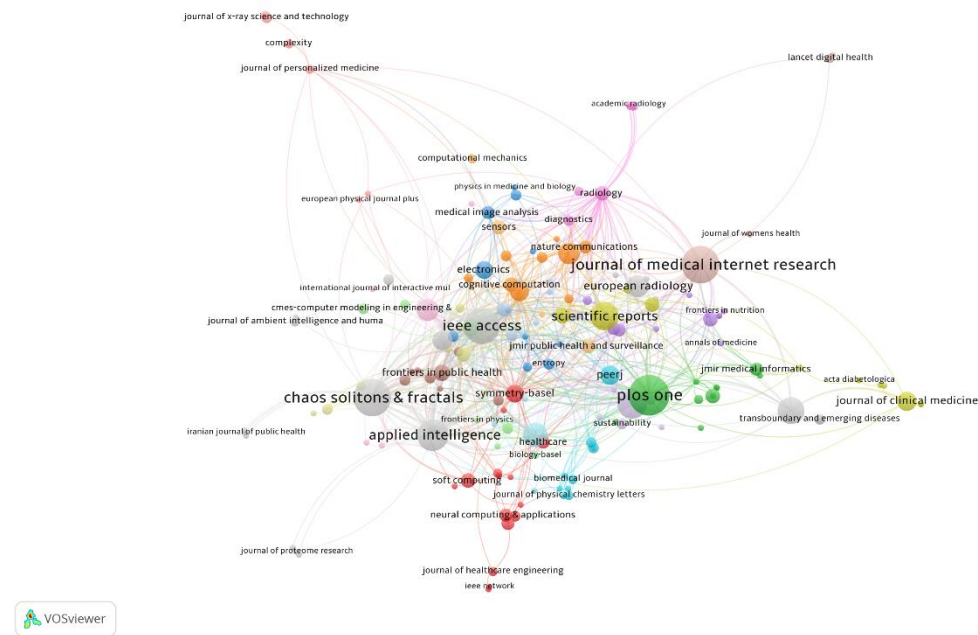

**Figure S3:** Distribution of journal's contribution.

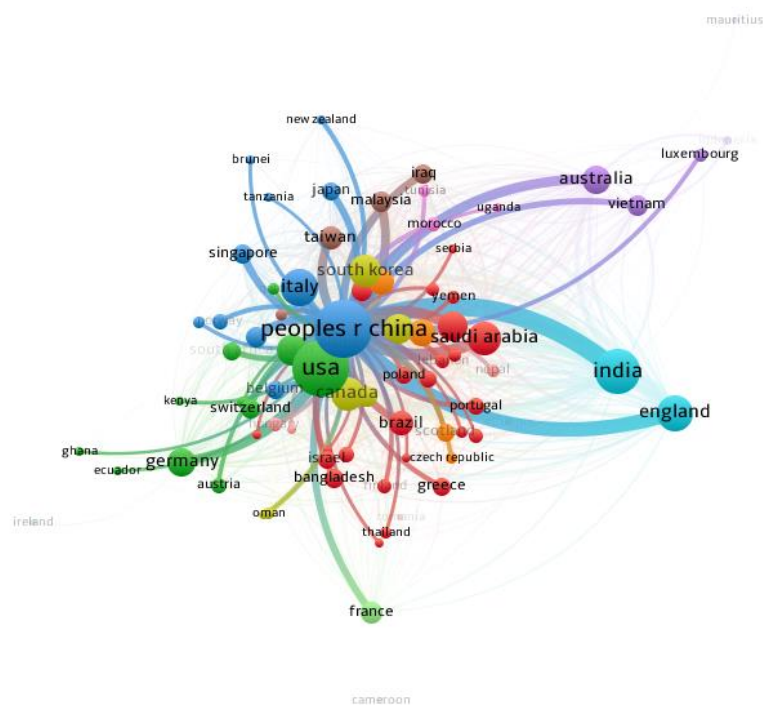

**Figure S4:** China’s collaboration with other countries

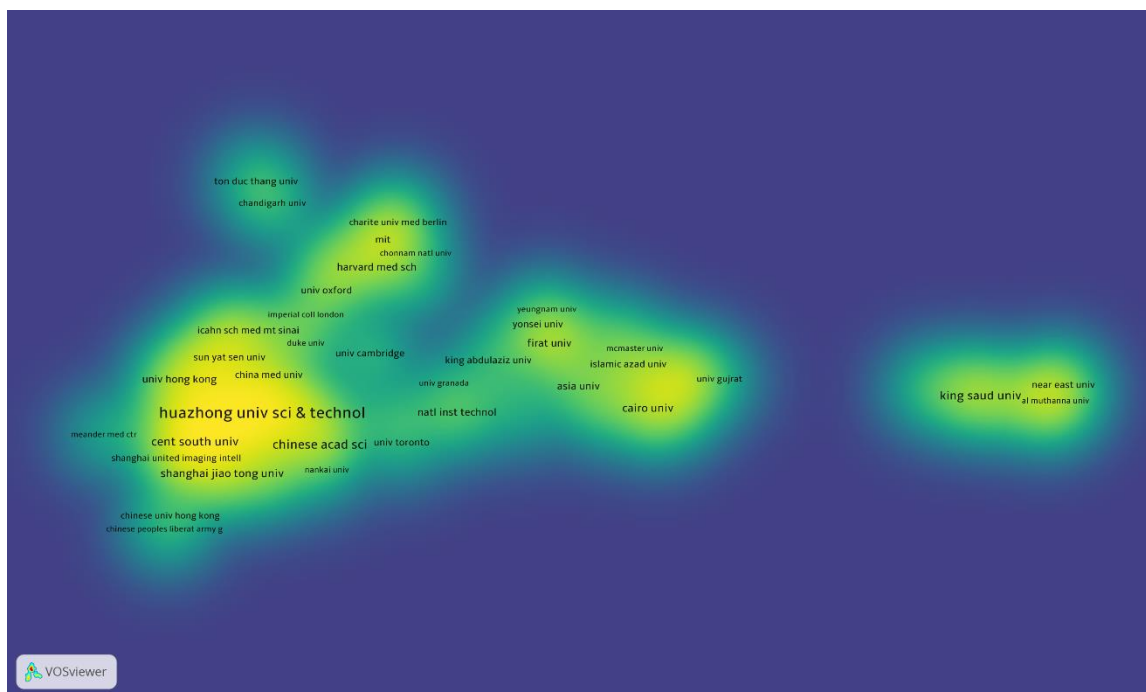

**Figure S5:** Distribution of institute’s contribution.
